# Supplementary material
Source: publisher site journal article supplement (https://jmir.org/api/download?alt_name=resprot_v10i2e13731_app4.pdf&filename=5fbdd3f0a896178ceec4ba0ceb4e2697.pdf)

Multimedia Appendix 4. Data extraction and cleaning flow diagram.

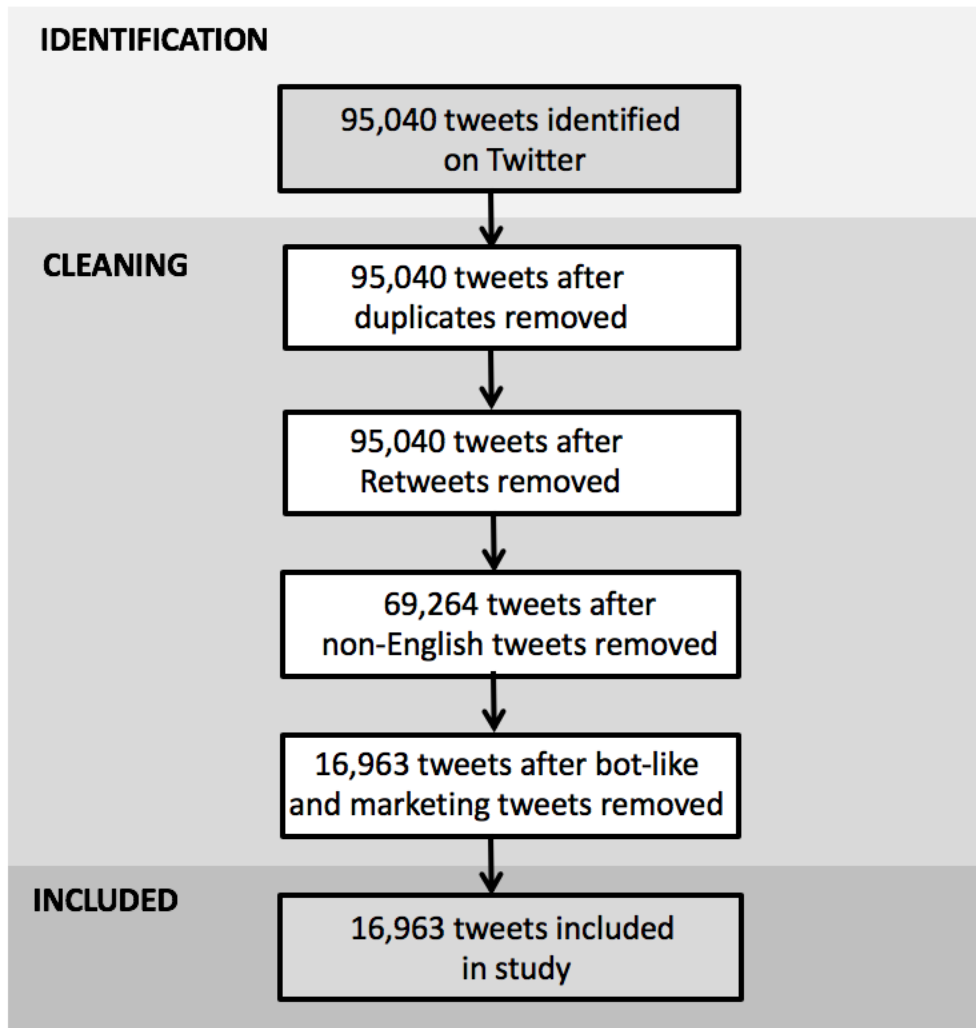

Supplement: Supplementary file [file download]
